# Supplementary material for: Synthesis, Crystal Structure, DFT Studies and Optical/Electrochemical Properties of Two Novel Heteroleptic Copper(I) Complexes and Application in DSSC
Source: MDPI journal article supplement (doi:10.3390/cryst12091240), 2022-09-01
Supplement: s1 [file s1]

## Supporting information

Synthesis, crystal structure, DFT studies and optical/electrochemical properties of two novel heteroleptic Copper(I) complexes and applications in DSSC.

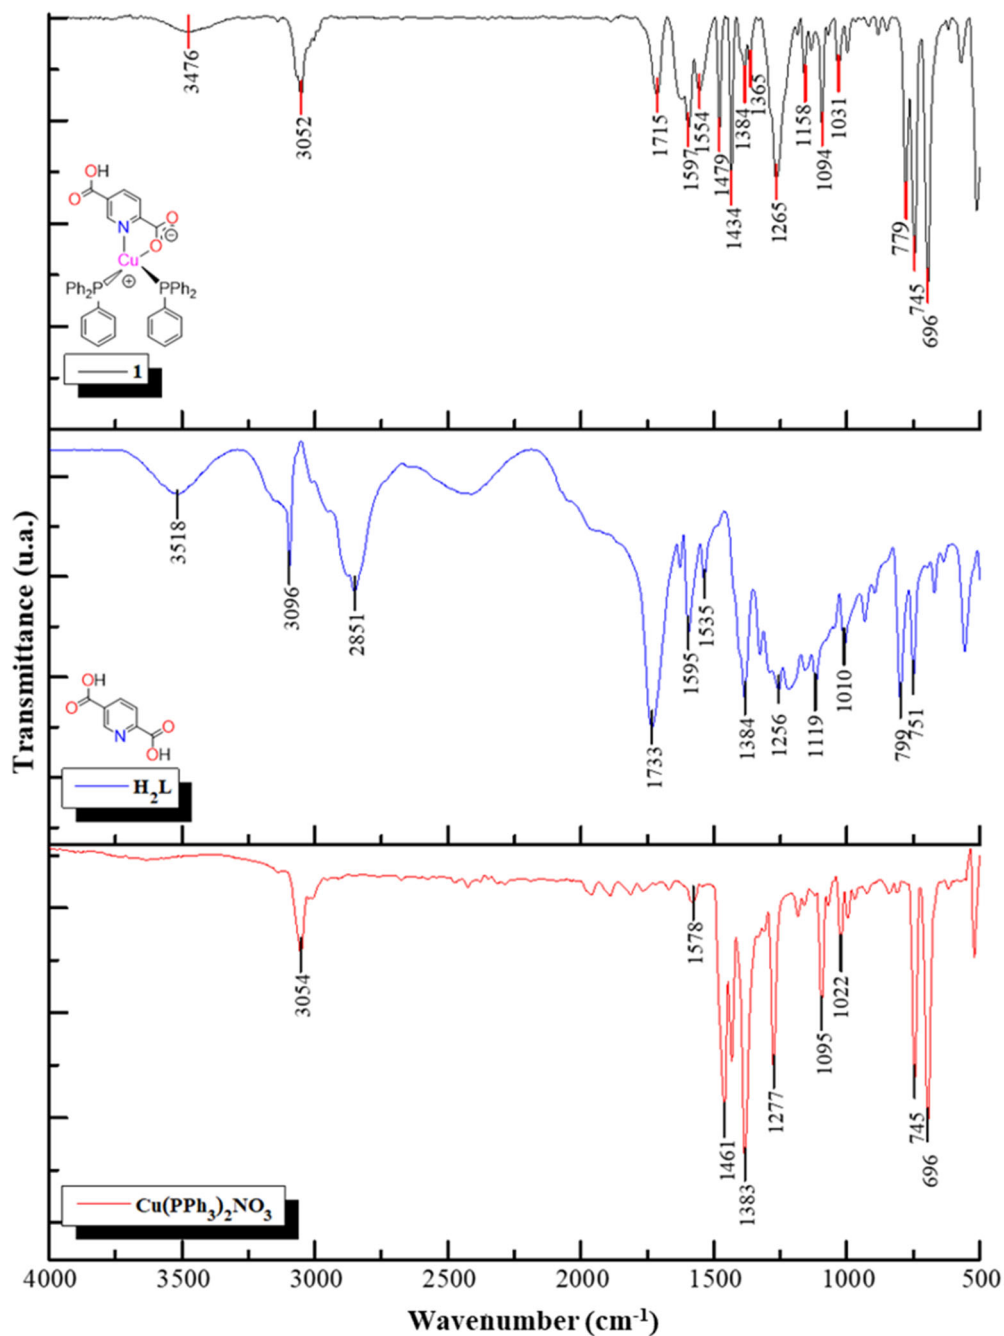

Figure S1. Infrared spectra of complex **1** and the corresponding starting materials.

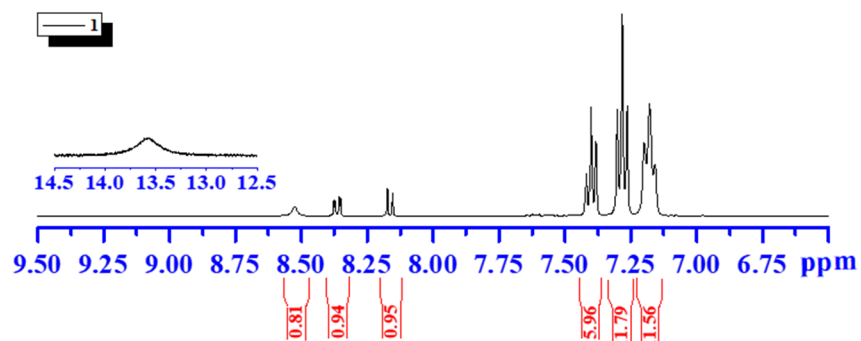

**Figure S2.**  $^1\text{H}$  NMR spectrum of **1** in  $\text{DMSO-}d_6$ .

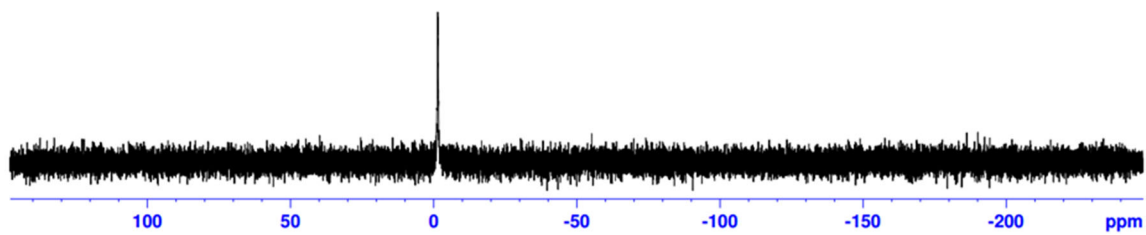

**Figure S3.**  $^{31}\text{P}$  NMR spectrum of **1** in  $\text{DMSO-}d_6$ .

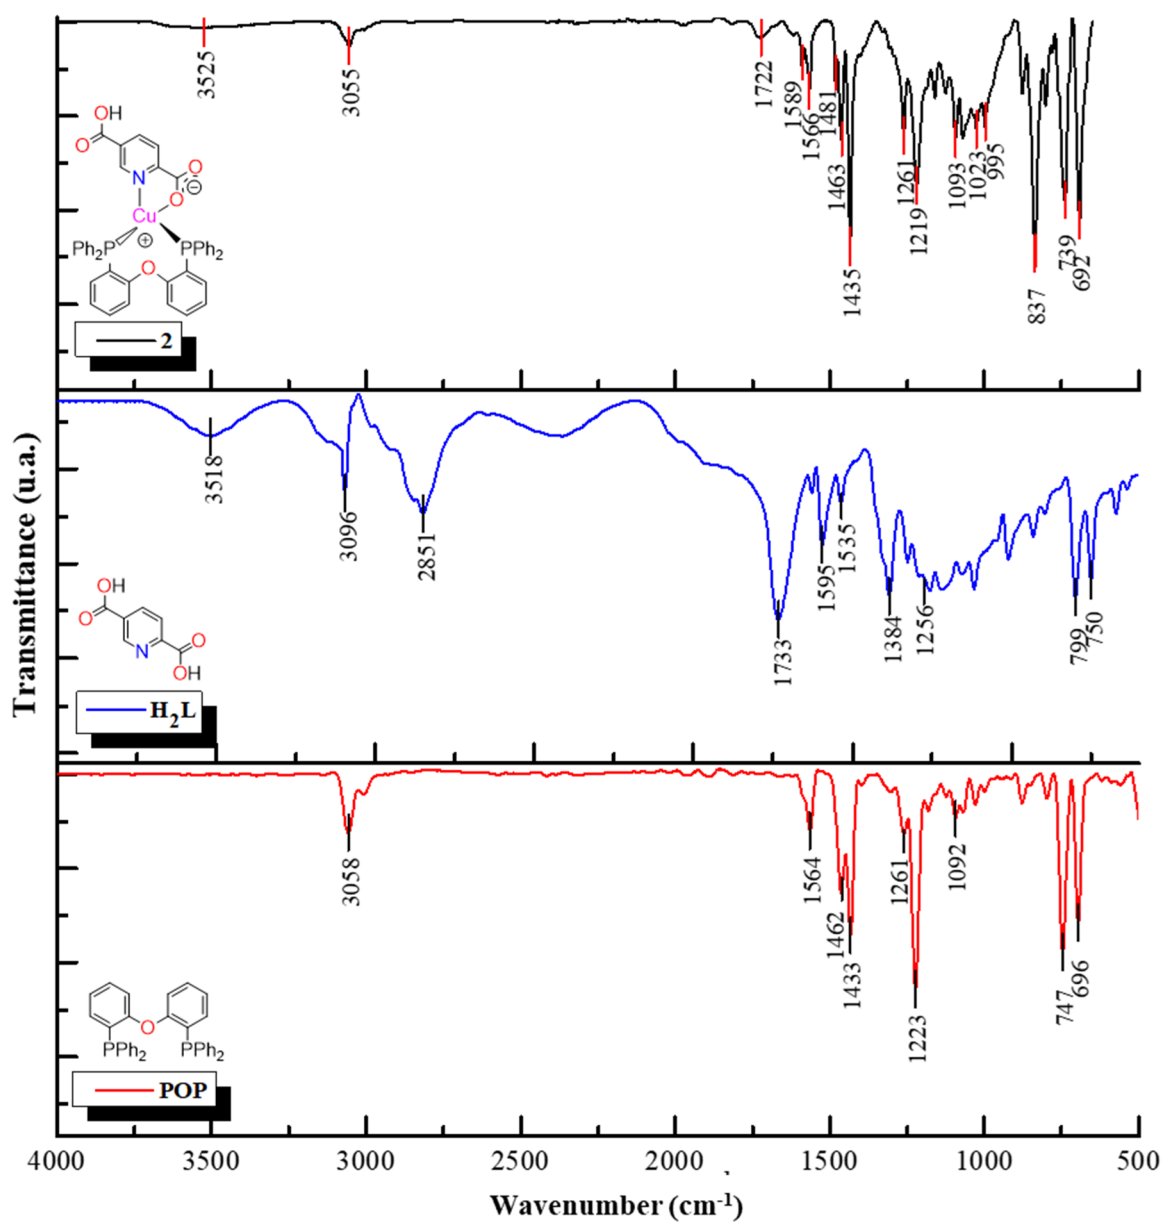

**Figure S4.** Infrared spectra of complex **2** and the corresponding starting materials.

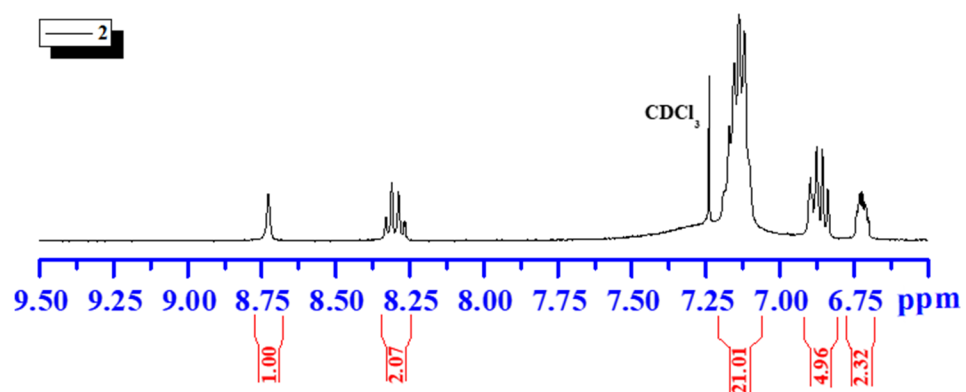

Figure S5. <sup>1</sup>H NMR spectrum of **2** in CDCl<sub>3</sub>.

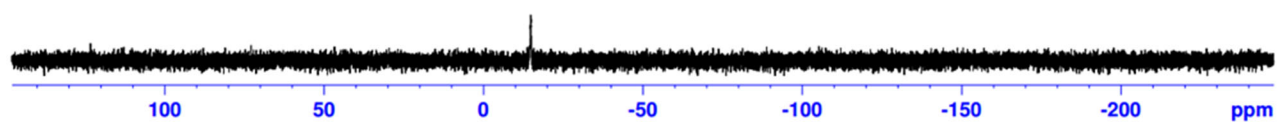

Figure S6. <sup>31</sup>P NMR spectrum of **2** in CDCl<sub>3</sub>.

**Table S1.** Geometries of intermolecular hydrogen bonds and  $\pi\cdots\pi$  contacts in complexes **1** and **2**.

| Complex  | $D-H\cdots A$        | $D-H$<br>[Å] | $H\cdots A$<br>[Å] | $D\cdots A$<br>[Å] | $\angle D-H\cdots A$<br>[°] | Symmetry code         |
|----------|----------------------|--------------|--------------------|--------------------|-----------------------------|-----------------------|
| <b>1</b> | O3–H3 $\cdots$ O2    | 0.82         | 1.79               | 2.600(2)           | 172                         | x, 1/2–y, –1/2+z      |
|          | O31–H31A $\cdots$ O1 | 0.85         | 2.63               | 3.340(2)           | 143                         | 1–x, –y, 1–z          |
|          | O31–H31A $\cdots$ O2 | 0.85         | 2.25               | 3.063(2)           | 160                         | 1–x, –y, 1–z          |
|          | O31–H31B $\cdots$ O4 | 0.85         | 2.01               | 2.857(2)           | 173                         | –1+x, y, z            |
|          | C3–H3A $\cdots$ O31  | 0.93         | 2.57               | 3.470(3)           | 163                         | 1+x, y, z             |
|          | C16–H16 $\cdots$ O31 | 0.93         | 2.52               | 3.355(3)           | 149                         | 1–x, 1/2+y, 1/2–z     |
|          | C17–H17 $\cdots$ O4  | 0.93         | 2.60               | 3.489(3)           | 159                         | 2–x, 1/2+y, 1/2–z     |
|          | C34–H34 $\cdots$ O1  | 0.93         | 2.55               | 3.361(3)           | 146                         | x, 1/2–y, –1/2+z      |
|          | C41–H41 $\cdots$ O31 | 0.93         | 2.49               | 3.319(3)           | 149                         | x, y, z               |
|          | C22–H22 $\cdots$ Cg1 | 0.93         | 3.77               | 4.404(3)           | 128                         | 1–x, 1–y, 1–z         |
|          | C18–H18 $\cdots$ Cg2 | 0.93         | 2.72               | 3.511(3)           | 143                         | 2–x, 1–y, 1–z         |
|          | Cg3 $\cdots$ Cg3     | –            | –                  | 3.739(3)           | –                           | 1–x, 1–y, 1–z         |
| <b>2</b> | O5–H5 $\cdots$ O2    | 0.82         | 1.74               | 2.555(2)           | 173                         | –1/2+x, 1/2–y, 1/2+z  |
|          | C6–H6 $\cdots$ O4    | 0.95         | 2.48               | 3.255(2)           | 139                         | 1/2+x, 1/2–y, –1/2+z  |
|          | C9–H9 $\cdots$ O3    | 0.95         | 2.57               | 3.480(3)           | 159                         | –1/2+x, 1/2–y, –1/2+z |
|          | C19–H19 $\cdots$ O3  | 0.95         | 2.45               | 3.371(2)           | 163                         | 1/2–x, 1/2+y, 1/2–z   |
|          | C30–H30 $\cdots$ O4  | 0.95         | 2.49               | 3.406(3)           | 162                         | 1/2+x, 1/2–y, –1/2+z  |
|          | C44–H44B $\cdots$ O4 | 0.99         | 2.33               | 3.302(3)           | 166                         | x, y, z               |
|          | C17–H17 $\cdots$ C11 | 0.95         | 2.93               | 3.506(2)           | 120                         | 1/2–x, 1/2+y, 1/2–z   |
|          | C42–H42 $\cdots$ C11 | 0.95         | 2.89               | 3.752(2)           | 152                         | x, y, z               |
|          | C15–H15 $\cdots$ Cg4 | 0.95         | 3.17               | 4.003(4)           | 148                         | –1/2+x, 1/2–y, –1/2+z |
|          | C23–H23 $\cdots$ C12 | 0.95         | 2.98               | 3.415(2)           | 110                         | 1/2–x, 1/2+y, 3/2–z   |

**1:** Cg1 = N1, C1, C2, C3, C4, C5; Cg2 = C8, C9, C10, C11, C12, C13; Cg3 = C20, C21, C22, C23, C24, C25. **2:** Cg4 = C1, C2, C21, C22, C23, C24.

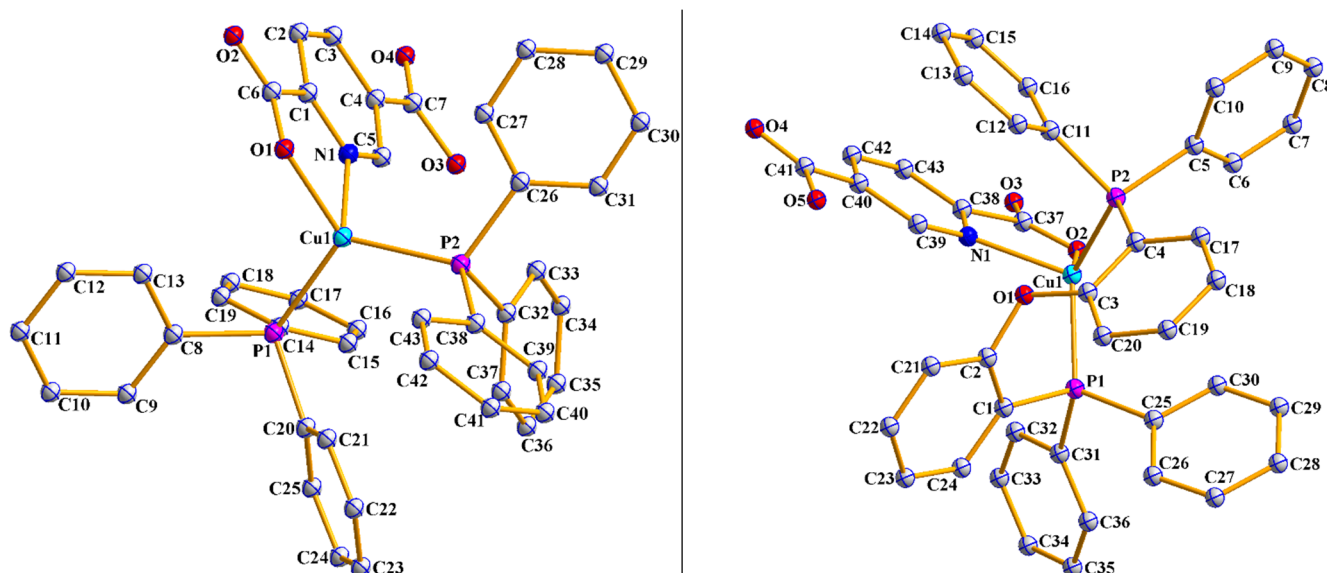

**Figure S7.** Geometry-optimized structures of complexes **1** (left) and **2** (right) at the M06/6-31G(d)+DZVP level of theory. Hydrogen atoms are omitted for clarity.

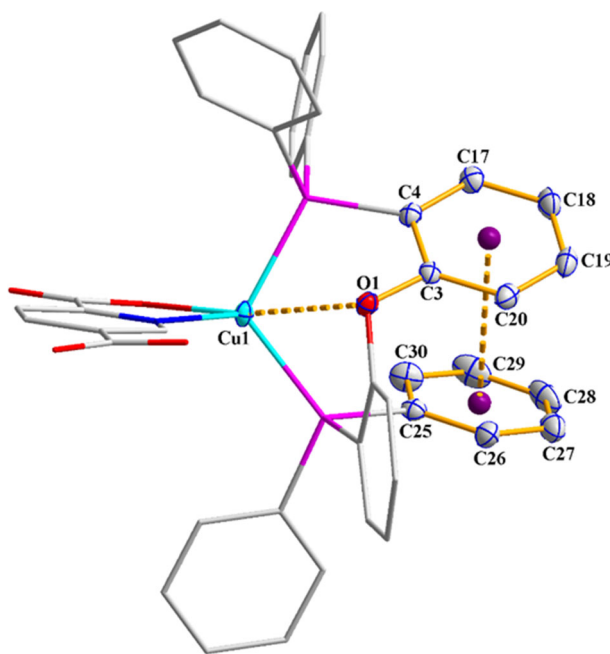

**Figure S8.** Intramolecular Cu1...O1 and  $\pi \cdots \pi$  interactions in the crystal structure of **2**. Hydrogen atoms have been omitted for clarity.

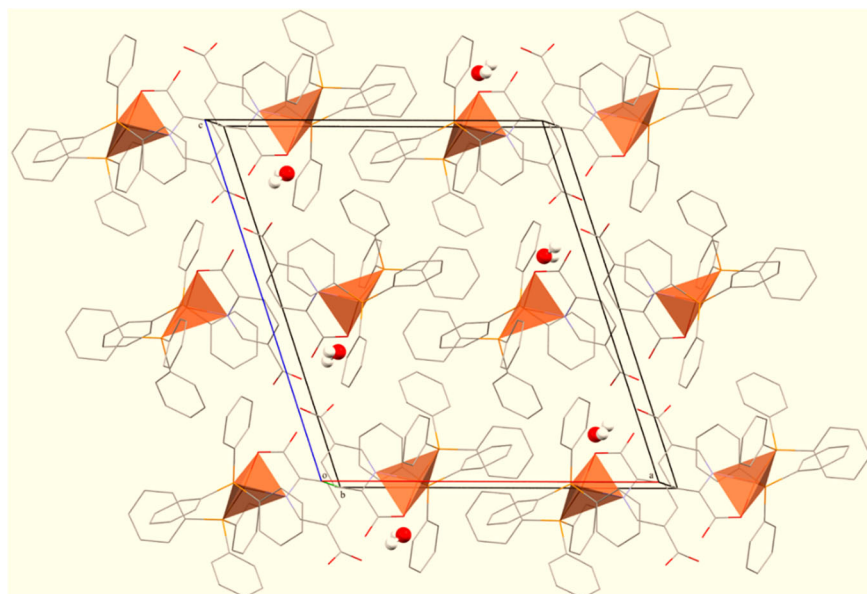

**Figure S9.** Perspective view of the three-dimensional (3D) hydrogen-bonded network in the crystal structure of complex **1**, formed through  $\text{O}-\text{H}\cdots\text{O}^-$ ,  $\text{O}_w-\text{H}\cdots\text{O}^-$ ,  $\text{O}_w-\text{H}\cdots\text{O}_{\text{C}=\text{O}}$ ,  $\text{C}-\text{H}\cdots\text{O}^-/\text{O}_w/\text{O}_{\text{C}=\text{O}}$ ,  $\text{C}-\text{H}\cdots\pi$  and  $\pi\cdots\pi$  interactions. Hydrogen atoms have been omitted for clarity.

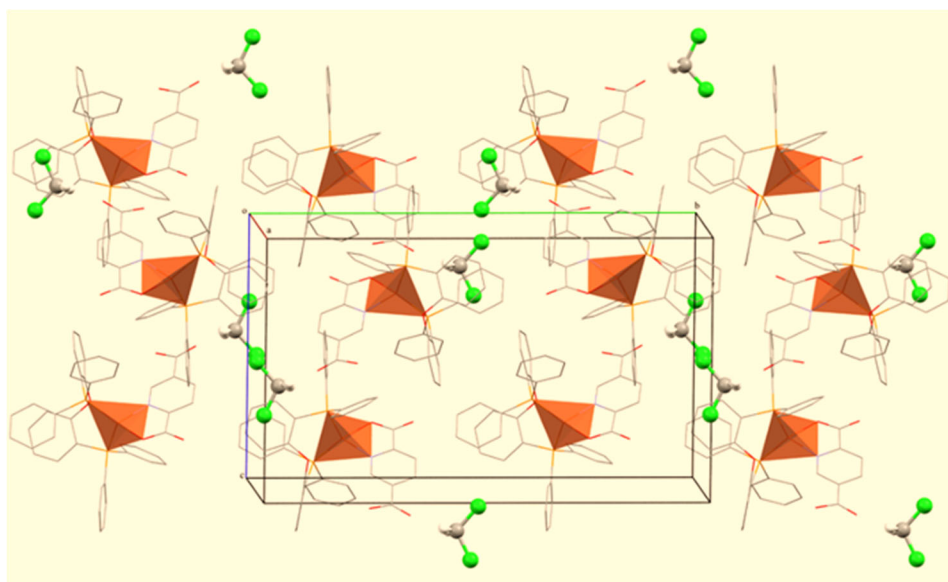

**Figure S10.** Perspective view of the three-dimensional (3D) hydrogen-bonded network in the crystal structure of complex **2**, formed through  $\text{O}-\text{H}\cdots\text{O}^-$ ,  $\text{C}-\text{H}\cdots\text{O}^-/\text{O}_{\text{C}=\text{O}}$ ,  $\text{C}-\text{H}\cdots\text{Cl}$ ,  $\text{C}-\text{Cl}\cdots\pi$  and  $\text{C}-\text{H}\cdots\pi$  interactions. Hydrogen atoms are omitted for clarity.

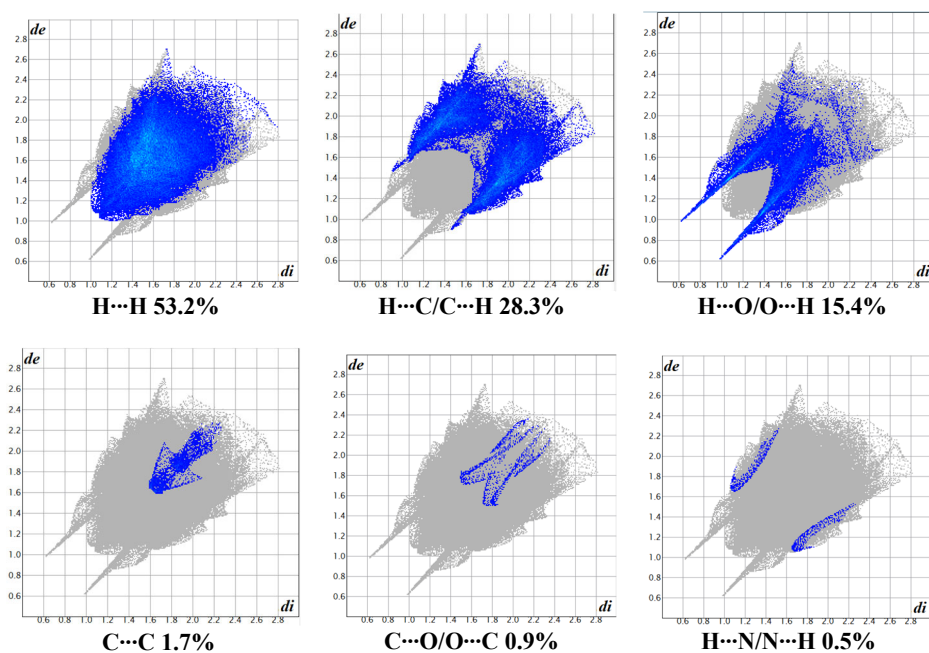

**Figure S11.** Percentages of intermolecular interactions in the fingerprint plot for complex 1

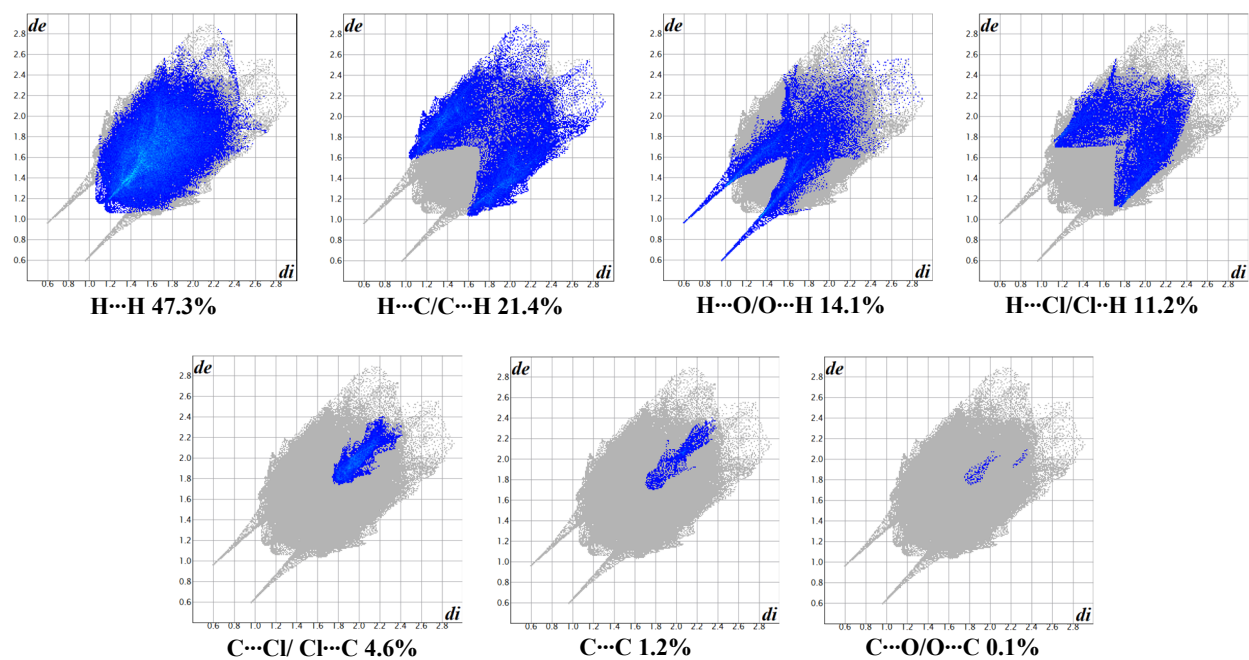

**Figure S12.** Percentages of intermolecular interactions in the fingerprint plot for complex 2



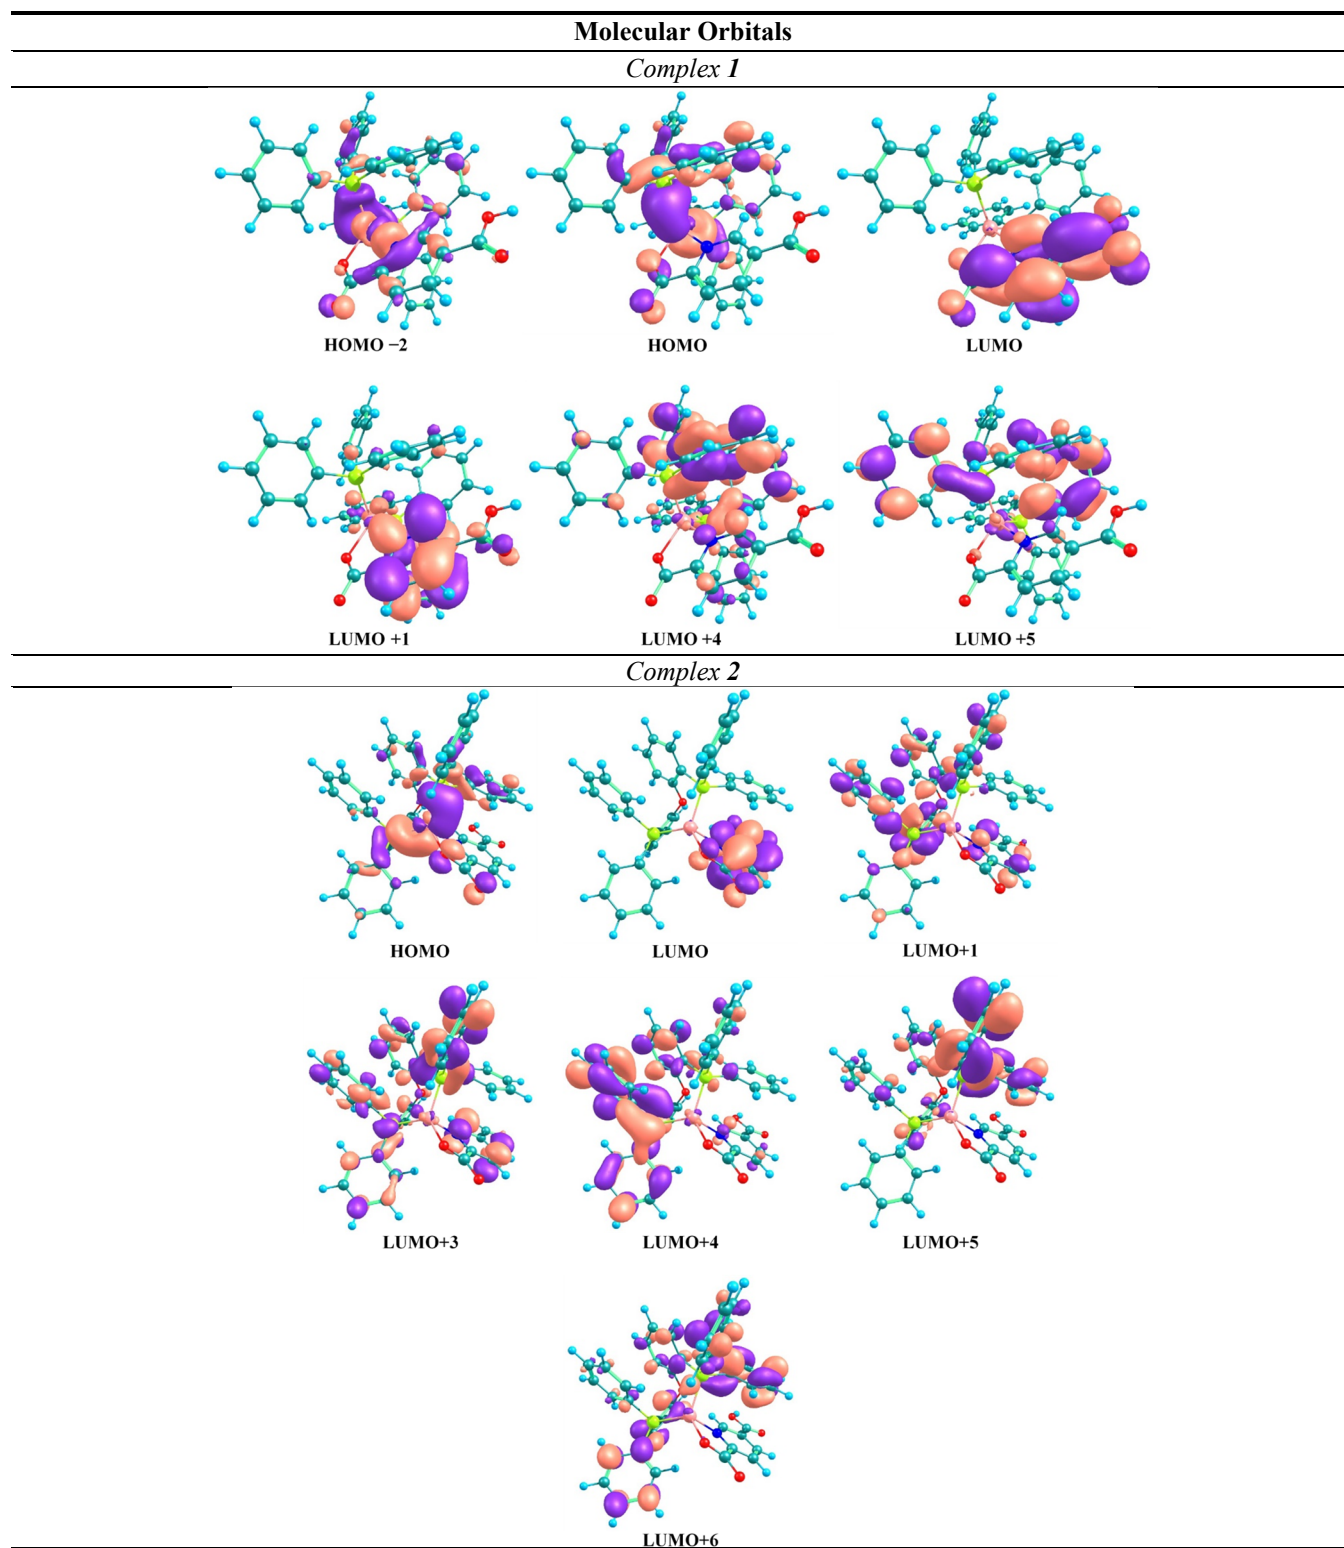

**Figure S13.** HOMO and LUMO frontier orbital plots of complexes **1** and **2** based on TD-DFT calculations.

**Table S2.** Data extracted from the calculated electronic absorption spectra using Time-dependent Density Functional Theory (TD-DFT) at the level M06-2X/6-31G(d)+DZVP for complexes **1** and **2**.

| Complex  | $\lambda_{\text{DFT}}$<br>(nm) | $\lambda_{\text{Exp}}$<br>(nm) | Character                                                                                                                                                                                       | Transitions (CI Coef.) | $f$    | HOMO<br>(eV) | LUMO<br>(eV) | $\Delta E$<br>(eV) |
|----------|--------------------------------|--------------------------------|-------------------------------------------------------------------------------------------------------------------------------------------------------------------------------------------------|------------------------|--------|--------------|--------------|--------------------|
| <b>1</b> | 421                            | 364                            | MLCT <sub>Cu→L</sub> /LLCT(PPh <sub>3</sub> ) <sub>2</sub> →L                                                                                                                                   | HOMO→LUMO (99%)        | 0.0145 | -5.918       | -1.825       | 4.093              |
|          | 328                            | 265                            | MLCT <sub>Cu→L</sub> /(PPh <sub>3</sub> ) <sub>2</sub> /LLCT(PPh <sub>3</sub> ) <sub>2</sub> →L/<br>$\pi \rightarrow \pi^*$ (PPh <sub>3</sub> ) <sub>2</sub> → (PPh <sub>3</sub> ) <sub>2</sub> | HOMO→LUMO+1 (98%)      | 0.0367 | -5.918       | -0.949       | 4.969              |
|          | 287                            | 265                            | MLCT <sub>Cu→L</sub> /(PPh <sub>3</sub> ) <sub>2</sub> /LLCT(PPh <sub>3</sub> ) <sub>2</sub> →L/<br>$\pi \rightarrow \pi^*$ (PPh <sub>3</sub> ) <sub>2</sub> → (PPh <sub>3</sub> ) <sub>2</sub> | HOMO→LUMO+4 (92%)      | 0.0406 | -5.918       | -0.673       | 5.245              |
|          | 279                            | 265                            | MLCT <sub>Cu→L</sub> /(PPh <sub>3</sub> ) <sub>2</sub> /LLCT(PPh <sub>3</sub> ) <sub>2</sub> →L/<br>$\pi \rightarrow \pi^*$ (PPh <sub>3</sub> ) <sub>2</sub> → (PPh <sub>3</sub> ) <sub>2</sub> | HOMO→LUMO+5 (85%)      | 0.0266 | -5.918       | -0.551       | 5.367              |
|          |                                |                                |                                                                                                                                                                                                 |                        |        |              |              |                    |
| <b>2</b> | 422                            | 383                            | MLCT <sub>Cu→L</sub> /LLCT <sub>POP→L</sub>                                                                                                                                                     | HOMO→LUMO (99%)        | 0.0136 | -5.857       | -1.775       | 4.082              |
|          | 327                            | 265                            | MLCT <sub>Cu→POP/L</sub> /LLCT <sub>POP→L</sub> /<br>$\pi \rightarrow \pi^*$ <sub>POP→POP</sub>                                                                                                 | HOMO→LUMO+1 (97%)      | 0.0376 | -5.857       | -0.956       | 4.901              |
|          | 302                            | 265                            | MLCT <sub>Cu→POP/L</sub> /LLCT <sub>POP→L</sub> /<br>$\pi \rightarrow \pi^*$ <sub>POP→POP</sub>                                                                                                 | HOMO→LUMO+3 (86%)      | 0.0484 | -5.857       | -0.829       | 5.028              |
|          | 293                            | 265                            | MLCT <sub>Cu→POP/L</sub> /LLCT <sub>POP→L</sub> /<br>$\pi \rightarrow \pi^*$ <sub>POP→POP</sub>                                                                                                 | HOMO→LUMO+4 (93%)      | 0.0411 | -5.857       | -0.801       | 5.056              |
|          | 282                            | 265                            | MLCT <sub>Cu→POP</sub> / $\pi \rightarrow \pi^*$ <sub>POP→POP</sub>                                                                                                                             | HOMO→LUMO+5 (90%)      | 0.0521 | -5.857       | -0.632       | 5.225              |
|          | 273                            | 265                            | MLCT <sub>Cu→POP</sub> / $\pi \rightarrow \pi^*$ <sub>POP→POP</sub>                                                                                                                             | HOMO→LUMO+6 (66%)      | 0.0407 | -5.857       | -0.433       | 5.424              |

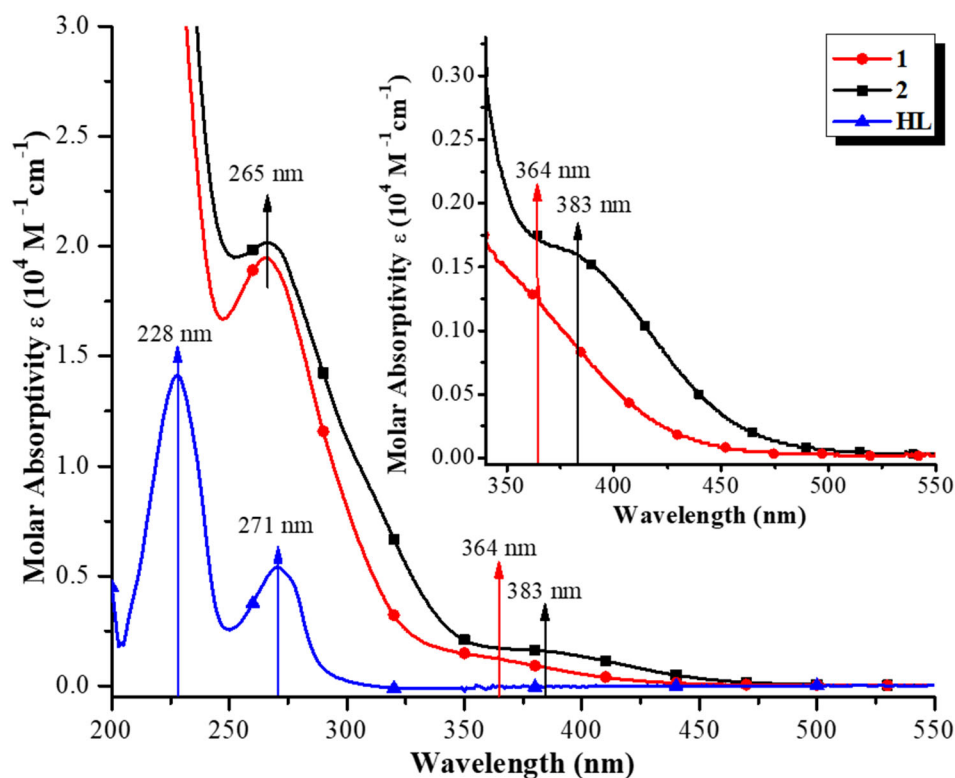

**Figure S14.** UV-vis absorption spectra of **1**, **2** and free ligand **H<sub>2</sub>L** recorded for a  $6 \times 10^{-5}$  mol/L solution in EtOH.

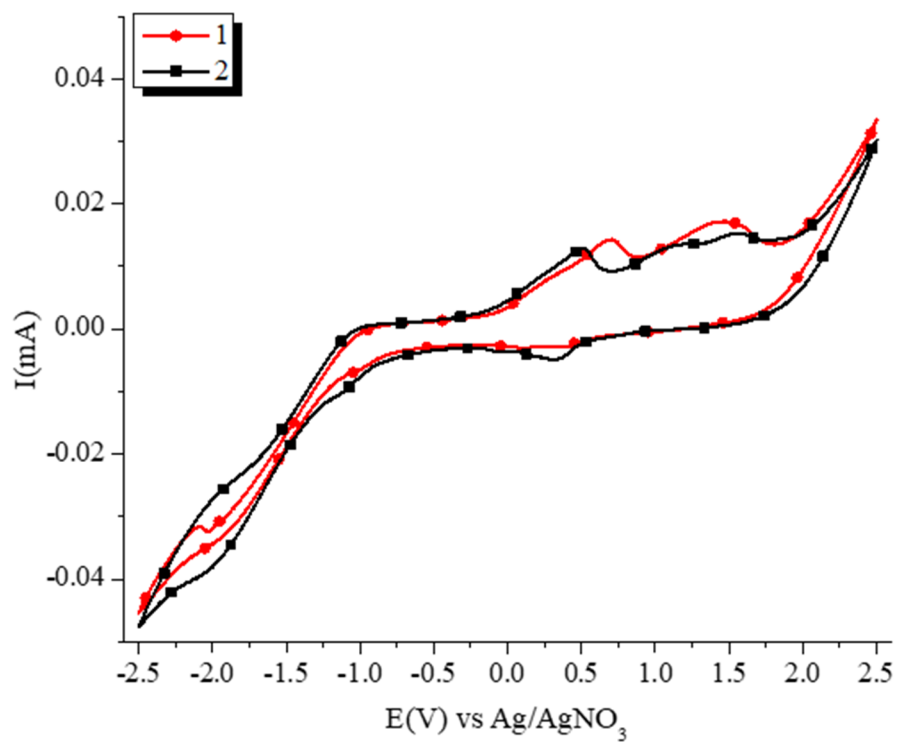

**Figure S15.** Cyclic voltammograms of **1** and **2** (ca.  $8 \times 10^{-5}$  M) in EtOH and  $\text{CH}_2\text{Cl}_2$ , respectively, at  $T = 298$  K using  $(n\text{Bu}_4\text{N})\text{PF}_6$  (0.025 M) as supporting electrolyte (scan rate =  $100 \text{ mVs}^{-1}$ ).
